# Supplementary material for: Unconjugated Bile Acids Influence Expression of Circadian Genes: A Potential Mechanism for Microbe-Host Crosstalk
Source: PubMed Central journal article supplement (PMC5132238; doi:10.1371/journal.pone.0167319), 2016-12-01
Supplement: pone.0167319.s003.pdf [file pone.0167319.s003.pdf]

Supplementary Table S1. List of human primer and sequences used for qRT-PCR analysis

| Human primer     | Sequence (5'→3')         |
|------------------|--------------------------|
| hClock_L         | gagagcgcgaaggaaatct      |
| hClock_R         | gcagctttgcaggaacaagta    |
| hArntl_L         | caggaaaaataggccgaatg     |
| hArntl_R         | gcgatgacccttctatcctg     |
| hPer1_L          | ggacactcctgcgaccag       |
| hPer1_R          | gggagtgaggtggaagatctaa   |
| hPer2_L          | gactgcaaactggcacttc      |
| hPer2_R          | gtgtctgagggttcatcacg     |
| hPer3_L          | gcgattctcatgacatacc      |
| hPer3_R          | tgctgctgcctcatacttc      |
| hCry1_L          | catcctggaccctggtt        |
| hCry1_R          | caagacactgaagcaaaaatcg   |
| hCry2_L          | gagcaaggatgcctgagact     |
| hCry2_R          | cggtgatcagcttctctgc      |
| hROR $\alpha$ _L | gcattatcttctgcattgtactga |
| hROR $\alpha$ _R | tgcagttttcaatcttaccctttc |
| hNR1D1_L         | aactcctggcgcttacc        |
| hNR1D1_R         | gaagcggaattctccatgc      |
| hE4BP4_L         | cgccccttcttctcct         |
| hE4BP4_R         | agttggcctccttcgttat      |
| hACTB_L          | attggcaatgagcggttc       |
| hACTB_R          | cgtggatgccacaggact       |
| hNpas2_L         | caggctatgactactaccattga  |
| hNpas2_R         | ttccaactgcatcagg         |
| hDbp_L           | aggcaagaaaaatccaggtg     |
| hDbp_R           | gcctcgttcttctgtaccg      |
