# Supplementary material for: Unconjugated Bile Acids Influence Expression of Circadian Genes: A Potential Mechanism for Microbe-Host Crosstalk
Source: PubMed Central journal article supplement (PMC5132238; doi:10.1371/journal.pone.0167319), 2016-12-01
Supplement: pone.0167319.s004.pdf [file pone.0167319.s004.pdf]

Supplementary Table S2. List of mouse primer and sequences used for qRT-PCR analysis

| Mouse primer | Sequence (5'→3')        |
|--------------|-------------------------|
| mClock_L     | ccagtcagttggtccatcatt   |
| mClock_R     | tggctcctaactgagctgaaa   |
| mNpas_L      | ggccaggactccaacgctc     |
| mNpas_R      | tgctgaagctcaggacac      |
| mArntl_L     | agtacgcctcccctgat       |
| mArntl_      | tgtctggagtcctccattt     |
| mPer1_L      | gcttcgtggacttgacacct    |
| mPer1_R      | tgcttagatcggcagtggt     |
| mPer 2_L     | atcgtgaagaacgcggata     |
| mPer 2_R     | caggatcttccagaaacca     |
| mPer 3_L     | cggagagtatgtcattctggatt |
| mPer 3_R     | tggtggcaaaaacatcttca    |
| mCry1_L      | atcgtgcgcatctcacatac    |
| mCry1_R      | tccgccattgagttctatgat   |
| mCry2_L      | gcagagcctggttcaagc      |
| mCry2_R      | gccactggatagtgtctctgg   |
| mRora_L      | cctactgttcctcaccaacg    |
| mRora_R      | atgttctgggcaagggttc     |
| mNr1d1_L     | cccaggaagtctacaagtgg    |
| mNr1d1_R     | agcacatgccattcagc       |
| mDbp_L       | gcctctgagcgacaggac      |
| mDbp_R       | aaggctcctcagccaag       |
| mE4BP4_L     | agggagcagaaccacgataa    |
| mE4BP4_R     | ccggatggaggagacaaat     |
